# Supplementary material for: Humanized CXCL12 antibody delays onset and modulates immune response in alopecia areata mice: insights from single-cell RNA sequencing
Source: Front Immunol. 2024 Oct 17;15:1444777. doi: 10.3389/fimmu.2024.1444777 (PMC11524852; doi:10.3389/fimmu.2024.1444777)
Supplement: Supplementary file 2 [file Table1.xlsx]

## Sheet: Table S1 Annotation summary
	Short name	Cell type	Selected marker gene	# of cells
Epidermis	IFE B	Interfollicular epidermis, basal	Krt5, Krt14	9118
keratinocytes	IFE BC	Interfollicular epidermis, basal (cycling)	Krt5, Krt14, Stmn1, Mki67	339
	IFE S	Interfollicular epidermis, suprabasal	Krt1, Krt10	2437
	uHF	Upper hair follicle	Krt17, Krt79	3556
	SG	Sebaceous gland	Scd1, Mgst1	128
	OB	Outer bulge	Barx2	512
Hair follicle	IB G	Germinative layer	Krt27, Krt35	1896
keratinocytes	IB IM	Inner root sheath & medulla	Krt27, Krt35	2549
	IB C	Cortex / cuticle	Krt27, Krt35	309
Fibroblast-like	Fib	Fibroblast	Col1a1, Lum	178
cells	DP	Dermal papilla	Corin, Notum	176
Immune cells	(gd)TC	(gd)T cell	Cd3e, Trdc	1137
	Mono	Monocyte	Cd14, Ccl6	136
	DC/Mac	Dendritic cell & macrophage	Cd68, Cd74	223
	LC	Langerhans cell	Cd207	40
	BC	B cell	Cd79a	43
Others	SkM	Skeletal muscle	Acta1, Des	266
	Mel	Melanocyte	Pmel, Dct	124

## Sheet: Table S2 Type II interferon
Symbol	Description	log2(fold change) AA vs. Neg	log2(fold change) AA+Ab vs. Ab
Acod1	aconitate decarboxylase 1	-1.08	2.57
Actg1	actin, gamma, cytoplasmic 1	0.28	-0.44
Actr2	actin related protein 2	0.29	-0.1
Actr3	ARP3 actin-related protein 3	0.28	-0.32
Adamts13	ADAM metallopeptidase with thrombospondin type 1 motif 13	-0.31	0.37
Aif1	allograft inflammatory factor 1	0.93	-1.48
Aqp4	aquaporin 4	0.83	-0.4
Arg1	arginase, liver	0.42	-0.02
Ass1	argininosuccinate synthetase 1	-0.33	0.45
Atl2	atlastin GTPase 2	0.38	-0.71
Atl3	atlastin GTPase 3	0	0.06
Bst2	bone marrow stromal cell antigen 2	0.58	-0.55
Calcoco2	calcium binding and coiled-coil domain 2	-2.04	1.82
Calm1	calmodulin 1	0.09	0.09
Calm2	calmodulin 2	0.1	0.07
Calm3	calmodulin 3	-0.37	0.31
Camk2a	calcium/calmodulin-dependent protein kinase II alpha	-0.46	-0.8
Capg	capping actin protein, gelsolin like	-0.06	0
Casp1	caspase 1	0.55	-0.53
Ccl2	C-C motif chemokine ligand 2	-0.41	1.27
Ccl5	C-C motif chemokine ligand 5	1.64	-1.46
Cd40	CD40 antigen	1.68	-1.43
Cd47	CD47 antigen (Rh-related antigen, integrin-associated signal transducer)	0.04	0.07
Cd74	CD74 antigen (invariant polypeptide of major histocompatibility complex, class II antigen-associated)	0.42	-0.48
Cdc37	cell division cycle 37	-0.07	0.14
Cdc42	cell division cycle 42	0.07	0.02
Cdc42ep2	CDC42 effector protein 2	-0.76	0.69
Cdc42ep4	CDC42 effector protein 4	0.22	-0.07
Ciita	class II transactivator	0.6	-0.73
Cited1	Cbp/p300-interacting transactivator with Glu/Asp-rich carboxy-terminal domain 1	-1.26	0.41
Cldn1	claudin 1	0.29	-0.36
Cxcl16	C-X-C motif chemokine ligand 16	0.48	-0.72
Cyp27b1	cytochrome P450, family 27, subfamily b, polypeptide 1	-0.34	-0.48
Dapk1	death associated protein kinase 1	0.42	-0.46
Dapk3	death-associated protein kinase 3	-0.15	0.14
Daxx	Fas death domain-associated protein	0.01	0.1
Dnaja3	DnaJ heat shock protein family (Hsp40) member A3	-0.21	0.22
Edn1	endothelin 1	0.5	-1.25
Eprs1	glutamyl-prolyl-tRNA synthetase 1	NA	NA
Evl	Ena-vasodilator stimulated phosphoprotein	-0.21	0.1
Fasl	Fas ligand	2.07	-2.01
Flnb	filamin, beta	0.37	-0.5
Gapdh	glyceraldehyde-3-phosphate dehydrogenase	-0.11	0.09
Gapdh-ps15	glyceraldehyde-3-phosphate dehydrogenase, pseudogene 15	NA	NA
Gapdhrt	glyceraldehyde-3-phosphate dehydrogenase, retrotransposed	NA	NA
Gapdhrt2	glyceraldehyde-3-phosphate dehydrogenase, retrotransposed 2	NA	NA
Gbp2	guanylate binding protein 2	1.54	-1.06
Gbp2b	guanylate binding protein 2b	1.72	-1.02
Gbp3	guanylate binding protein 3	0.98	-1.09
Gbp4	guanylate binding protein 4	0.6	-0.55
Gbp5	guanylate binding protein 5	1.36	-1.01
Gbp6	guanylate binding protein 6	1.67	-1.36
Gbp7	guanylate binding protein 7	1.5	-0.96
Gbp8	guanylate-binding protein 8	3.05	-2.43
Gbp9	guanylate-binding protein 9	2.22	-1.31
Gbp10	guanylate-binding protein 10	1.69	-1.35
Gbp11	guanylate binding protein 11	NA	NA
Gch1	GTP cyclohydrolase 1	0.83	-0.55
Gsn	gelsolin	0.21	-0.18
H2-Q7	histocompatibility 2, Q region locus 7	0.5	-0.41
H2-Q9	histocompatibility 2, Q region locus 9	NA	NA
Hpx	hemopexin	1.58	-0.79
Ifitm1	interferon induced transmembrane protein 1	0.81	1.13
Ifitm2	interferon induced transmembrane protein 2	-0.15	0.41
Ifitm3	interferon induced transmembrane protein 3	0.15	-0.22
Ifitm6	interferon induced transmembrane protein 6	-0.38	0.29
Ifitm7	interferon induced transmembrane protein 7	-1.68	2.17
Ifng	interferon gamma	3.64	-1.83
Ifngr1	interferon gamma receptor 1	0.23	-0.09
Igtp	interferon gamma induced GTPase	1.98	-1.43
Il12b	interleukin 12b	NA	NA
Il12rb1	interleukin 12 receptor, beta 1	-0.43	0.34
Il23r	interleukin 23 receptor	-0.41	-0.35
Irf1	interferon regulatory factor 1	0.92	-0.12
Irf8	interferon regulatory factor 8	0.87	-0.65
Irgm1	immunity-related GTPase family M member 1	1.25	-1.19
Irgm2	immunity-related GTPase family M member 2	1.76	-1.04
Jak1	Janus kinase 1	0.41	-0.42
Jak2	Janus kinase 2	0.51	-0.4
Kif5b	kinesin family member 5B	0.13	0.09
Kif16b	kinesin family member 16B	0.19	-0.22
Kynu	kynureninase	0.52	1.15
Med1	mediator complex subunit 1	0.16	-0.15
Mefv	Mediterranean fever	-0.59	1.72
Mir511	microRNA 511	NA	NA
Mrc1	mannose receptor, C type 1	1.61	-1.13
Mst1	macrophage stimulating 1 (hepatocyte growth factor-like)	-0.08	0.14
Myo1c	myosin IC	0.34	-0.46
Myo18a	myosin XVIIIA	0.31	-0.39
Nlrc5	NLR family, CARD domain containing 5	0.59	-0.35
Nos2	nitric oxide synthase 2, inducible	1.2	-1.75
Otop1	otopetrin 1	NA	0.8
Parp9	poly (ADP-ribose) polymerase family, member 9	0.6	-0.44
Parp10	poly (ADP-ribose) polymerase family, member 10	-0.06	0.29
Parp14	poly (ADP-ribose) polymerase family, member 14	0.75	-0.53
Pde12	phosphodiesterase 12	0.51	-0.14
Pim1	proviral integration site 1	0.77	-0.19
Pparg	peroxisome proliferator activated receptor gamma	0.64	-0.01
Ptpn2	protein tyrosine phosphatase, non-receptor type 2	0.18	-0.17
Rab7b	RAB7B, member RAS oncogene family	0.03	-0.17
Rab11fip5	RAB11 family interacting protein 5 (class I)	0.33	-0.1
Rab12	RAB12, member RAS oncogene family	-0.08	0.01
Rab20	RAB20, member RAS oncogene family	-0.06	0.22
Rab43	RAB43, member RAS oncogene family	-0.15	0.02
Rpl13a	ribosomal protein L13A	-0.14	0.13
Rps6kb1	ribosomal protein S6 kinase, polypeptide 1	0.08	-0.03
Shfl	shiftless antiviral inhibitor of ribosomal frameshifting	0.62	-0.82
Sirpa	signal-regulatory protein alpha	-0.07	0.01
Slc11a1	solute carrier family 11 (proton-coupled divalent metal ion transporters), member 1	-0.22	0.9
Slc22a5	solute carrier family 22 (organic cation transporter), member 5	0.32	-0.41
Slc22a21	solute carrier family 22 (organic cation transporter), member 21	0.22	0.06
Slc26a6	solute carrier family 26, member 6	0.32	-0.42
Slc30a8	solute carrier family 30 (zinc transporter), member 8	NA	NA
Slk	STE20-like kinase	0.49	-0.17
Snca	synuclein, alpha	0.17	0.45
Sp100	nuclear antigen Sp100	0.45	-0.19
Star	steroidogenic acute regulatory protein	0.04	-0.14
Stat1	signal transducer and activator of transcription 1	1.14	-0.88
Stx4a	syntaxin 4A (placental)	-0.06	0.09
Stx8	syntaxin 8	0.04	-0.12
Stx11	syntaxin 11	0.18	0.25
Stxbp1	syntaxin binding protein 1	0.62	-1.39
Stxbp2	syntaxin binding protein 2	-0.12	0.01
Stxbp3	syntaxin binding protein 3	0.34	-0.27
Stxbp4	syntaxin binding protein 4	0.13	-0.2
Syncrip	synaptotagmin binding, cytoplasmic RNA interacting protein	-0.01	0.28
Tgtp1	T cell specific GTPase 1	4.15	-2.83
Tlr2	toll-like receptor 2	-0.03	0.56
Tlr3	toll-like receptor 3	0.18	0.05
Tlr4	toll-like receptor 4	1.16	-0.2
Tnf	tumor necrosis factor	0.64	-0.15
Trim21	tripartite motif-containing 21	0.35	-0.1
Trp53	transformation related protein 53	-0.22	0.15
Txk	TXK tyrosine kinase	-0.48	-0.09
Tyk2	tyrosine kinase 2	0.12	-0.15
Ubd	ubiquitin D	2.2	-1.82
Vamp3	vesicle-associated membrane protein 3	0.12	-0.13
Vamp4	vesicle-associated membrane protein 4	0.11	-0.2
Vamp8	vesicle-associated membrane protein 8	-0.05	0.21
Vim	vimentin	0.77	-0.4
Vps26b	VPS26 retromer complex component B	0.2	-0.09
Was	Wiskott-Aldrich syndrome	0.44	0.24
Wnt5a	wingless-type MMTV integration site family, member 5A	0.01	0.43
Zyx	zyxin	0.25	-0.14

## Sheet: Table S3 Lymphocyte chemotaxis
Symbol	Description	log2(fold change) AA vs. Neg	log2(fold change) AA+Ab vs. Ab
Adam8	a disintegrin and metallopeptidase domain 8	0.12	-0.2
Adam10	a disintegrin and metallopeptidase domain 10	0.26	0.04
Adam17	a disintegrin and metallopeptidase domain 17	0.36	-0.16
Ccl2	C-C motif chemokine ligand 2	-0.41	1.27
Ccl3	C-C motif chemokine ligand 3	1.14	-0.13
Ccl5	C-C motif chemokine ligand 5	1.64	-1.46
Ccl7	C-C motif chemokine ligand 7	-0.23	0.28
Ccl12	C-C motif chemokine ligand 12	NA	-1.91
Ccl21a	C-C motif chemokine ligand 21 (serine)	3.43	0.09
Ccl26	C-C motif chemokine ligand 26	NA	NA
Ccl27a	C-C motif chemokine ligand 27A	-0.38	0.32
Ccr2	C-C motif chemokine receptor 2	0.47	-0.05
Ccr7	C-C motif chemokine receptor 7	-1.58	1.98
Ch25h	cholesterol 25-hydroxylase	0.42	-1.86
Cklf	chemokine-like factor	0.01	0.03
Cx3cl1	C-X3-C motif chemokine ligand 1	-0.13	-0.1
Cxcl10	C-X-C motif chemokine ligand 10	0.16	-0.86
Cxcl11	chemokine (C-X-C motif) ligand 11	NA	NA
Cxcl12	C-X-C motif chemokine ligand 12	0.79	-0.27
Cxcl13	C-X-C motif chemokine ligand 13	0.44	-0.65
Cxcl14	C-X-C motif chemokine ligand 14	-0.16	-0.05
Cxcl16	C-X-C motif chemokine ligand 16	0.48	-0.72
Cxcr3	C-X-C motif chemokine receptor 3	2.89	-1.77
Cyp7b1	cytochrome P450, family 7, subfamily b, polypeptide 1	0.16	-1.11
Gas6	growth arrest specific 6	0.02	-0.17
Gpr15lg	G protein coupled receptor 15 ligand	NA	NA
Gpr183	G protein-coupled receptor 183	0.42	0.28
Hsd3b7	hydroxy-delta-5-steroid dehydrogenase, 3 beta- and steroid delta-isomerase 7	0.21	-0.24
Klrk1	killer cell lectin-like receptor subfamily K, member 1	0.99	-0.6
Lgals9	lectin, galactose binding, soluble 9	0.33	0.02
Msmp	microseminoprotein, prostate associated	NA	NA
Nedd9	neural precursor cell expressed, developmentally down-regulated gene 9	-0.01	0.18
Oxsr1	oxidative-stress responsive 1	0.26	-0.15
Padi2	peptidyl arginine deiminase, type II	0.82	-0.79
Plec	plectin	0.08	-0.05
Ptk2b	PTK2 protein tyrosine kinase 2 beta	0.11	0.06
Slc8b1	solute carrier family 8 (sodium/lithium/calcium exchanger), member B1	0.15	-0.23
Slc12a2	solute carrier family 12, member 2	0.26	-0.07
Stk39	serine/threonine kinase 39	0.18	-0.26
Tmem102	transmembrane protein 102	0.27	-0.35
Tnfsf14	tumor necrosis factor (ligand) superfamily, member 14	1.61	-1.13
Wnk1	WNK lysine deficient protein kinase 1	0.26	-0.2
Wnt5a	wingless-type MMTV integration site family, member 5A	0.01	0.43
Xcl1	chemokine (C motif) ligand 1	-0.09	-0.98
